# Supplementary material for: Mind the gender gap: COVID-19 lockdown effects on gender differences in preprint submissions
Source: PubMed Central journal article supplement (PMC8956178; doi:10.1371/journal.pone.0264265), 2022-03-25

## Random effect: category

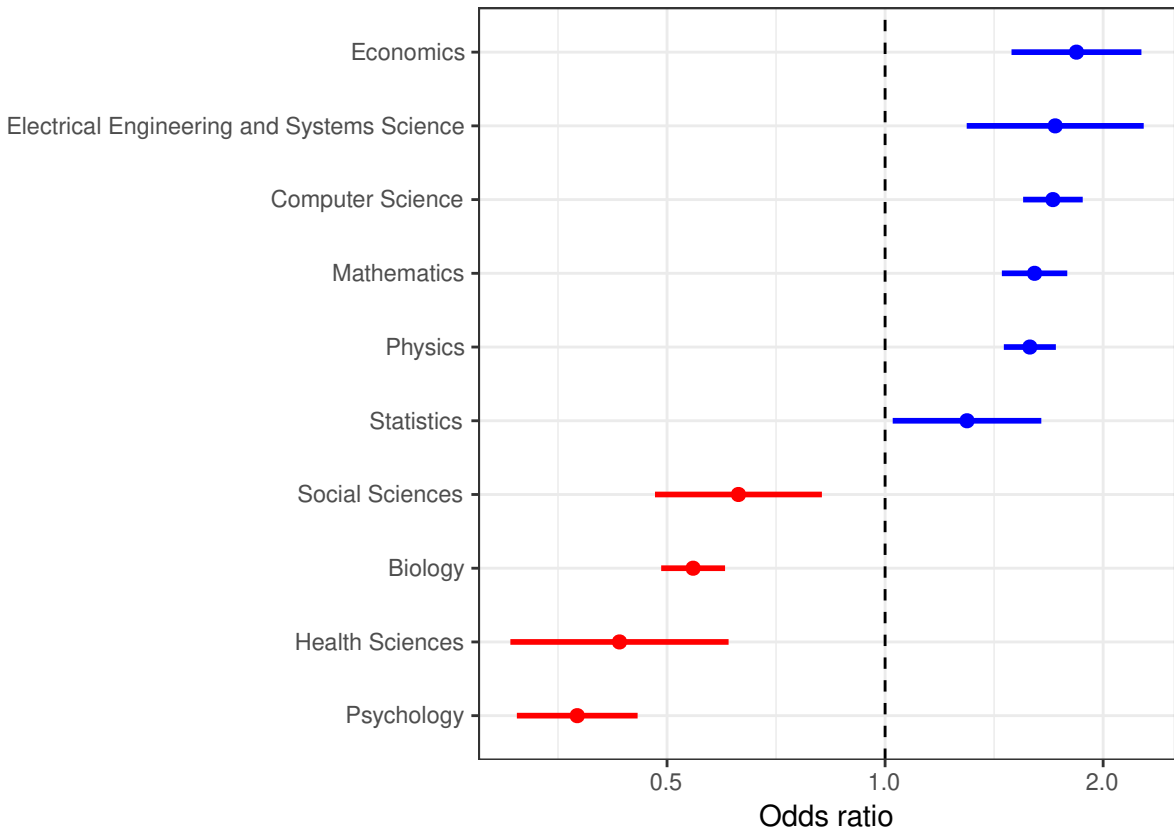

Supplement: pone.0264265.s001.pdf [file pone.0264265.s001.pdf]
