# Supplementary material for: Mind the gender gap: COVID-19 lockdown effects on gender differences in preprint submissions
Source: PubMed Central journal article supplement (PMC8956178; doi:10.1371/journal.pone.0264265), 2022-03-25

# Random effect: subcategory

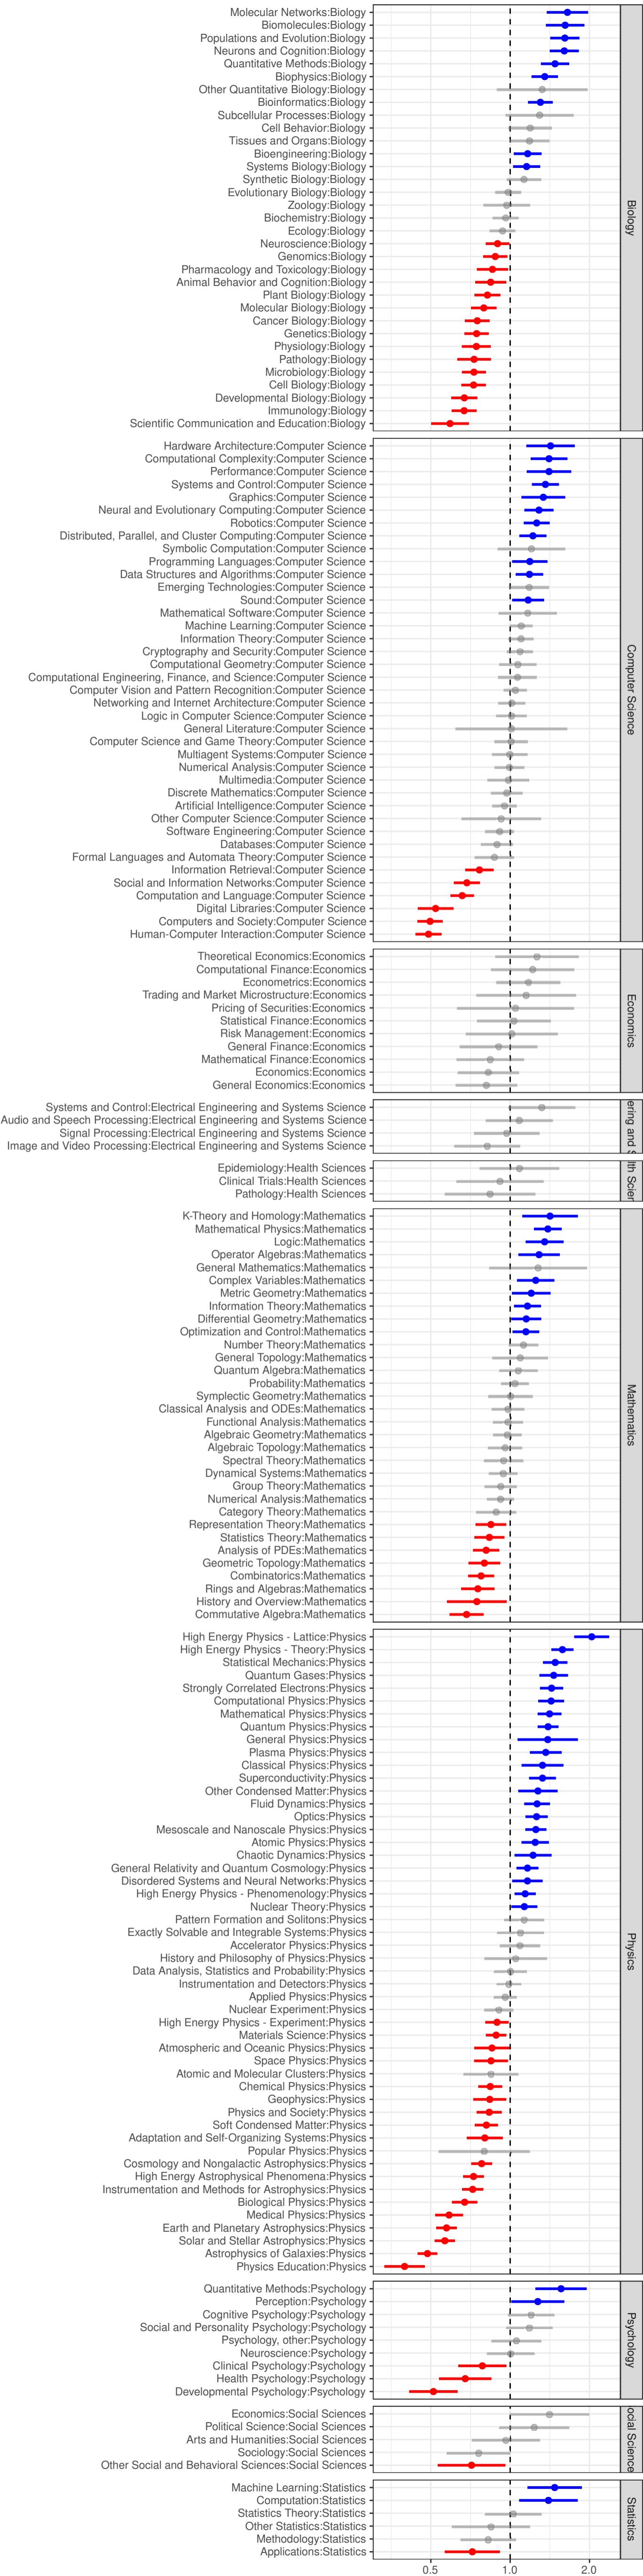

Supplement: pone.0264265.s002.pdf [file pone.0264265.s002.pdf]
