# Supplementary material for: Mind the gender gap: COVID-19 lockdown effects on gender differences in preprint submissions
Source: PubMed Central journal article supplement (PMC8956178; doi:10.1371/journal.pone.0264265), 2022-03-25
Supplement: pone.0264265.s003.pdf [file pone.0264265.s003.pdf]

| Repository | Category                   | # subcategories | # preprints |
|------------|----------------------------|-----------------|-------------|
| arXiv      | Computer Science           | 40              | 113629      |
|            | Economics                  | 3               | 1200        |
|            | Elec. Eng. Systems Science | 4               | 11140       |
|            | Mathematics                | 32              | 104761      |
|            | Physics                    | 51              | 184354      |
|            | Quantitative Biology       | 10              | 6186        |
|            | Quantitative Finance       | 9               | 2721        |
|            | Statistics                 | 6               | 25307       |
| bioRxiv    | Biology                    | 26              | 39181       |
| medRxiv    | Health Sciences            | 53              | 6122        |
| PsyArXiv   | Psychology                 | 223             | 17515       |
| SocArXiv   | Social Sciences            | 419             | 10397       |
| Total:     |                            | 876             | 522513      |
