# Supplementary material for: Mind the gender gap: COVID-19 lockdown effects on gender differences in preprint submissions
Source: PubMed Central journal article supplement (PMC8956178; doi:10.1371/journal.pone.0264265), 2022-03-25
Supplement: pone.0264265.s004.pdf [file pone.0264265.s004.pdf]

| Subcategory                                             | Recoded as                           |
|---------------------------------------------------------|--------------------------------------|
| Science and Technology Studies                          | Other Social and Behavioral Sciences |
| Environmental Studies                                   | Other Social and Behavioral Sciences |
| International and Area Studies                          | Other Social and Behavioral Sciences |
| Leisure Studies                                         | Other Social and Behavioral Sciences |
| Organization Development                                | Other Social and Behavioral Sciences |
| Leadership Studies                                      | Other Social and Behavioral Sciences |
| Library and Information Science                         | Arts and Humanities                  |
| Linguistics                                             | Arts and Humanities                  |
| Urban Studies and Planning                              | Sociology                            |
| Social Statistics                                       | Sociology                            |
| Social Work                                             | Law                                  |
| Legal Studies                                           | Law                                  |
| Public Affairs, Public Policy and Public Administration | Political Science                    |
| Agricultural and Resource Economics                     | Economics                            |
